# Supplementary material
Source: PubMed Central journal article supplement (PMC7227042)
Supplement: ao0c00657_si_001.pdf [file ao0c00657_si_001.pdf]

# Supplementary information for

## Characterization of $\text{Cu}_2\text{ZnSnS}_4$ particles obtained by the hot-injection method

Sara Engberg<sup>\*†</sup>, Joanna Symonowicz<sup>b†</sup>, Jørgen Schou<sup>a</sup>, Stela Canulescu<sup>a</sup>, and Kirsten M. Ø. Jensen<sup>\*b</sup>

a: Department of Photonics Engineering, Technical University of Denmark, DK-4000, Roskilde, Denmark.

b: Department of Chemistry and Nanoscience Center, University of Copenhagen, Universitetsparken 5, DK-2100, Copenhagen, Denmark.

\* Corresponding authors: S.E. ([sleen@fotonik.dtu.dk](mailto:sleen@fotonik.dtu.dk)), K.M.Ø.J ([kirsten@chem.ku.dk](mailto:kirsten@chem.ku.dk))

† These authors contributed equally.

### Calculated PXRD patterns

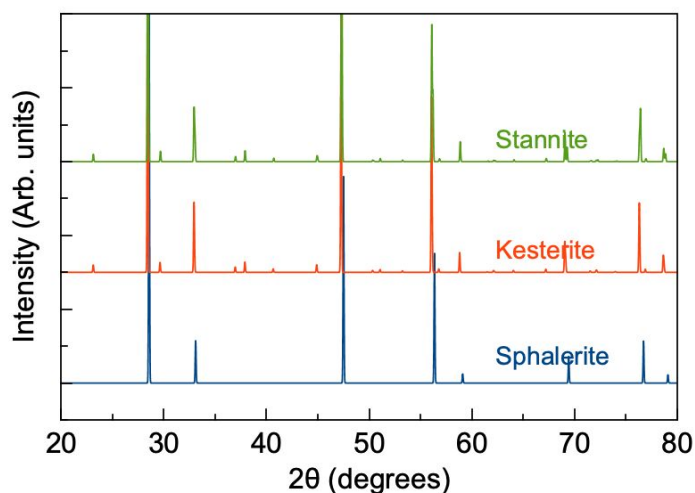

Figure S1: Calculated diffraction patterns for the stannite, kesterite and sphalerite structures, illustrated in Figure 1.

<sup>1</sup> Department of Physics, University of Cambridge, JJ Thomson Ave, Cambridge CB3 0HE, United Kingdom.

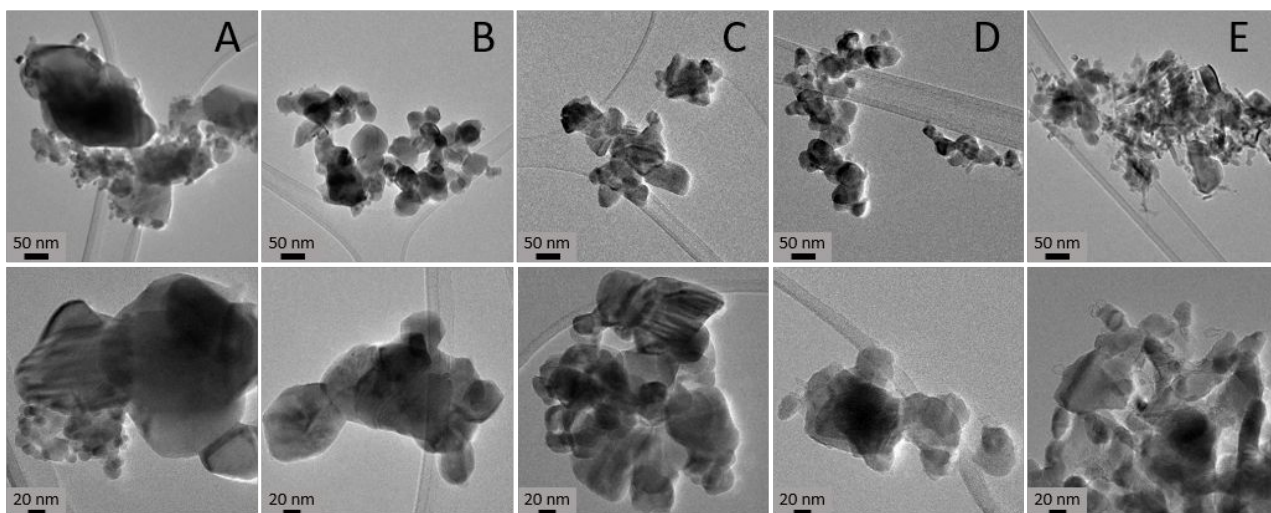

Figure S2: TEM images of annealed samples A to E at different magnification.

### Rietveld results

|                    |          |
|--------------------|----------|
| $R_{\text{Bragg}}$ | 6.72%    |
| $R_{\text{F}}$     | 4.42%    |
| $a$ (Å)            | 5.433(3) |
| $c$ (Å)            | 10.79(1) |
| $\gamma$           | 0.618(5) |
| Crystallite size   | 9.1 nm   |

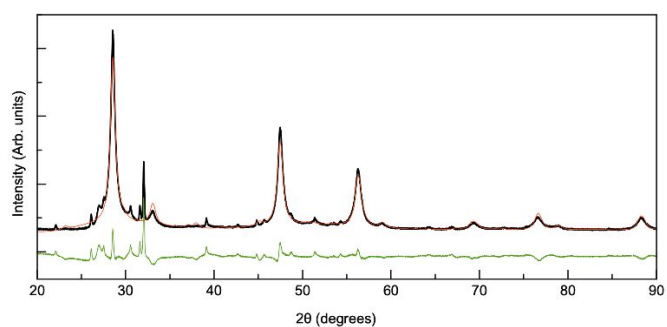

Figure S3: Rietveld refinement of laboratory data obtained for as-synthesized sample A.

|                    |          |
|--------------------|----------|
| $R_{\text{Bragg}}$ | 6.17%    |
| $R_{\text{F}}$     | 4.58%    |
| $a$ (Å)            | 5.434(2) |
| $c$ (Å)            | 10.81(1) |
| $\gamma$           | 0.436(7) |
| Crystallite size   | 12.8 nm  |

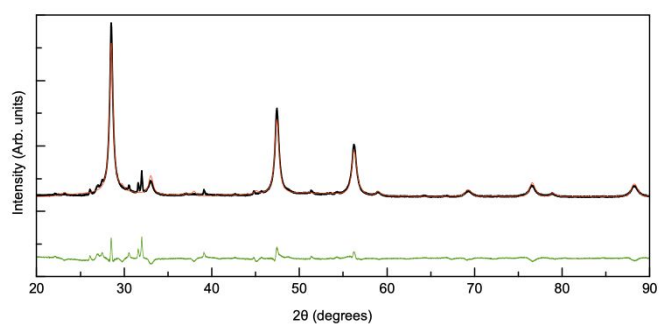

Figure S4: Rietveld refinement of laboratory data obtained for as-synthesized sample B.

|                    |          |
|--------------------|----------|
| $R_{\text{Bragg}}$ | 6.02%    |
| $R_{\text{F}}$     | 4.66%    |
| $a$ (Å)            | 5.433(1) |
| $c$ (Å)            | 10.82(1) |
| $\gamma$           | 0.26(1)  |
| Crystallite size   | 21.0 nm  |

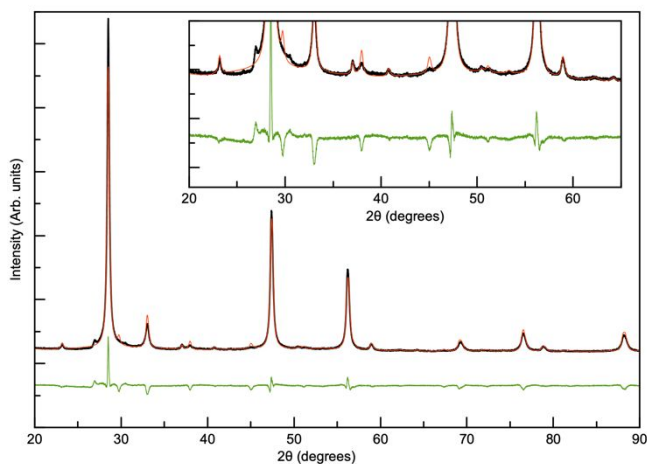

Figure S5: Rietveld refinement of laboratory data obtained for as-synthesized sample C. Inset shows a magnification of the difference curve.

|                                 |          |
|---------------------------------|----------|
| $R_{\text{Bragg}}$ (CZTS)       | 5.79%    |
| $R_{\text{F}}$ (CZTS)           | 8.51%    |
| $a$ (Å) (CZTS)                  | 5.443(2) |
| $c$ (Å) (CZTS)                  | 10.77(1) |
| $\gamma$ (CZTS)                 | 0.36(4)  |
| Crystallite size (CZTS)         | 15.2 nm  |
| Weight percent (CZTS)           | 35.16%   |
|                                 |          |
| $R_{\text{Bragg}}$ (Sphalerite) | 2.90%    |
| $R_{\text{F}}$ (Sphalerite)     | 3.25%    |
| $a$ (Å) (Sphalerite)            | 5.425(1) |
| $\gamma$ (Sphalerite)           | 0.19(1)  |
| Crystallite size (Sphalerite)   | 29 nm    |
| Weight percent (Sphalerite)     | 64.84%   |

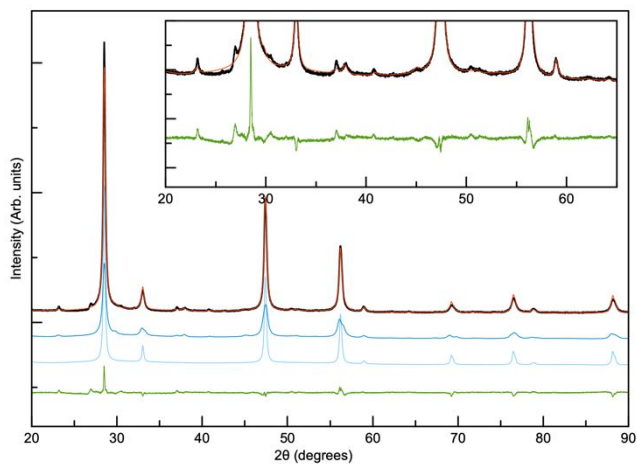

Figure S6: Rietveld refinement of laboratory data obtained for as-synthesized sample C, fitting with the kesterite CZTS and sphalerite ZnS structure. The contributions to the fit are shown in dark blue (kesterite) and light blue (sphalerite). Inset shows a magnification of the difference curve.

|                    |          |
|--------------------|----------|
| $R_{\text{Bragg}}$ | 5.96%    |
| $R_{\text{F}}$     | 4.66%    |
| $a$ (Å)            | 5.436(1) |
| $c$ (Å)            | 10.79(1) |
| $Y$                | 0.493(4) |
| Crystallite size   | 11.4 nm  |

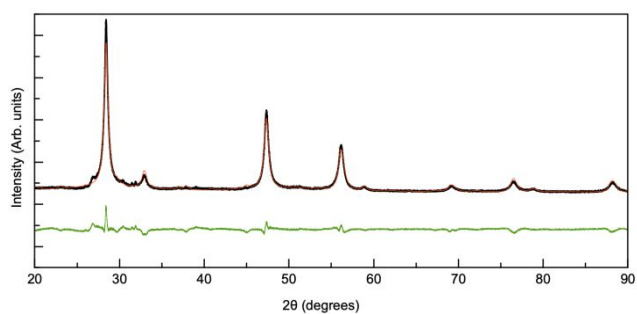

Figure S7: Rietveld refinement of laboratory data obtained for as-synthesized sample D.

|                    |          |
|--------------------|----------|
| $R_{\text{Bragg}}$ | 6.12%    |
| $R_{\text{F}}$     | 4.98%    |
| $a$ (Å)            | 5.433(1) |
| $c$ (Å)            | 10.82(1) |
| $Y$                | 0.257(2) |
| Crystallite size   | 21.9 nm  |

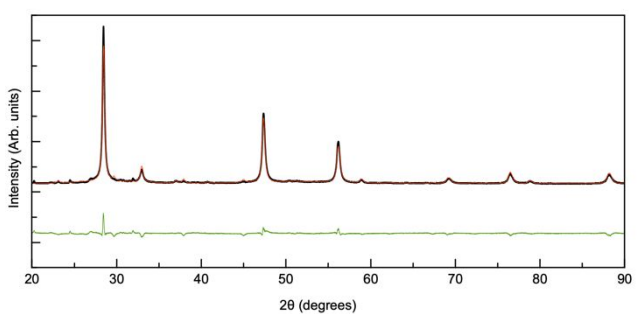

Figure S8: Rietveld refinement of laboratory data obtained for as-synthesized sample E.

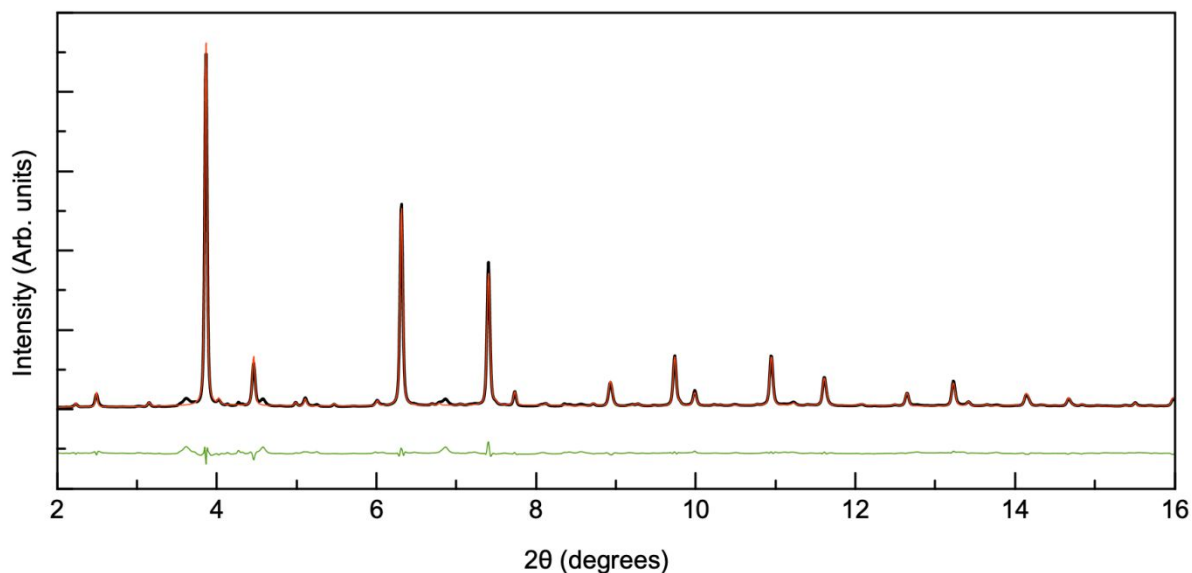

|                    |           |                         |                       |                |          |
|--------------------|-----------|-------------------------|-----------------------|----------------|----------|
| $R_{\text{Bragg}}$ | 6.39%     | $B_{\text{iso, Cu 2a}}$ | 0.7(2) Å <sup>2</sup> | $x_{\text{S}}$ | 0.77(3)  |
| $R_{\text{F}}$     | 9.66%     | $B_{\text{iso, Cu 2c}}$ | 0.8(3) Å <sup>2</sup> | $y_{\text{S}}$ | 0.74(2)  |
| $a$ (Å)            | 5.433(1)  | $B_{\text{iso, Zn 2d}}$ | 1.2(3) Å <sup>2</sup> | $z_{\text{S}}$ | 0.872(9) |
| $c$ (Å)            | 10.838(5) | $B_{\text{iso, Sn 2b}}$ | 0.7(2) Å <sup>2</sup> |                |          |
| $Y$                | 0.0177(4) | $B_{\text{iso, S 8g}}$  | 0.3(2) Å <sup>2</sup> |                |          |
| $U$                | -0.099(1) | Occ, Cu 2c              | 0.95(2)               |                |          |
| $V$                | 0.021(1)  | Occ, Sn 2b              | 0.95(2)               |                |          |

Figure S9: Rietveld refinement of synchrotron data obtained for annealed sample A.

|                      |           |                          |                       |                |          |
|----------------------|-----------|--------------------------|-----------------------|----------------|----------|
| $R_{\text{Bragg}}$   | 3.80%     | $B_{\text{iso}}$ , Cu 2a | 0.9(2) $\text{\AA}^2$ | $x_{\text{S}}$ | 0.77(2)  |
| $R_{\text{F}}$       | 8.89%     | $B_{\text{iso}}$ , Cu 2c | 0.7(2) $\text{\AA}^2$ | $y_{\text{S}}$ | 0.74(2)  |
| $a$ ( $\text{\AA}$ ) | 5.433(1)  | $B_{\text{iso}}$ , Zn 2d | 1.3(2) $\text{\AA}^2$ | $z_{\text{S}}$ | 0.871(6) |
| $c$ ( $\text{\AA}$ ) | 10.834(3) | $B_{\text{iso}}$ , Sn 2b | 0.7(2) $\text{\AA}^2$ |                |          |
| $Y$                  | 0.0190(8) | $B_{\text{iso}}$ , S 8g  | 0.7(2) $\text{\AA}^2$ |                |          |
| $U$                  | -0.083(9) | Occ, Cu 2c               | 0.92(2)               |                |          |
| $V$                  | 0.019(7)  | Occ, Sn 2b               | 0.94(2)               |                |          |

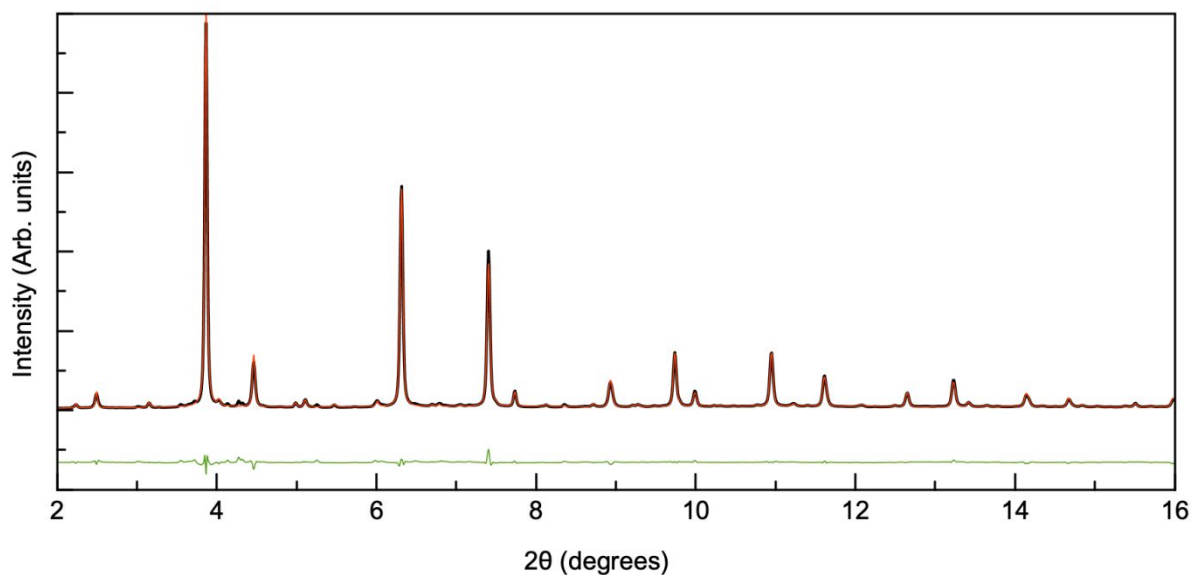

Figure S10: Rietveld refinement of synchrotron data obtained for annealed sample B.

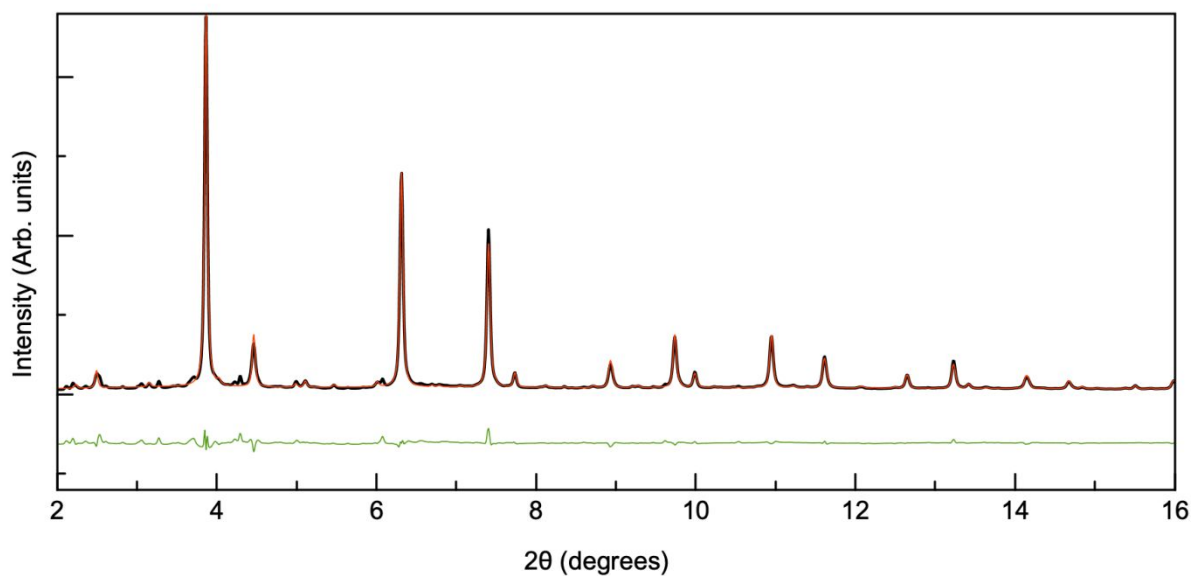

|                      |            |                          |                       |                |         |
|----------------------|------------|--------------------------|-----------------------|----------------|---------|
| $R_{\text{Bragg}}$   | 4.63%      | $B_{\text{iso}}$ , Cu 2a | 0.6(3) $\text{\AA}^2$ | $x_{\text{S}}$ | 0.77(4) |
| $R_{\text{F}}$       | 5.81%      | $B_{\text{iso}}$ , Cu 2c | 0.4(3) $\text{\AA}^2$ | $y_{\text{S}}$ | 0.73(2) |
| $a$ ( $\text{\AA}$ ) | 5.433(2)   | $B_{\text{iso}}$ , Zn 2d | 1.5(4) $\text{\AA}^2$ | $z_{\text{S}}$ | 0.87(1) |
| $c$ ( $\text{\AA}$ ) | 10.837(7)  | $B_{\text{iso}}$ , Sn 2b | 1.1(3) $\text{\AA}^2$ |                |         |
| $Y$                  | 0.0331(4)  | $B_{\text{iso}}$ , S 8g  | 0.4(2) $\text{\AA}^2$ |                |         |
| $U$                  | -0.0233(2) | Occ, Cu 2c               | 0.95(2)               |                |         |
| $V$                  | 0.011(1)   | Occ, Sn 2b               | 0.96(1)               |                |         |

Figure S11: Rietveld refinement of synchrotron data obtained for annealed sample C.

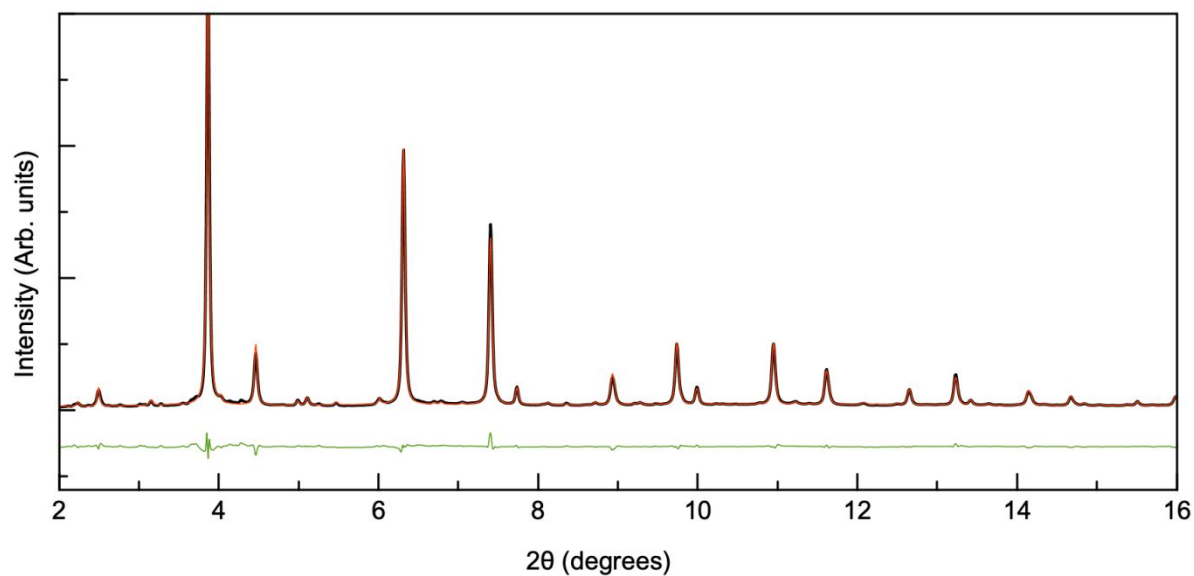

|                    |             |                                 |                        |                |           |
|--------------------|-------------|---------------------------------|------------------------|----------------|-----------|
| $R_{\text{Bragg}}$ | 2.61%       | $B_{\text{iso}}, \text{Cu } 2a$ | $0.7(2) \text{ \AA}^2$ | $x_{\text{S}}$ | $0.77(2)$ |
| $R_{\text{F}}$     | 4.44%       | $B_{\text{iso}}, \text{Cu } 2c$ | $0.6(2) \text{ \AA}^2$ | $y_{\text{S}}$ | $0.75(2)$ |
| $a$ (Å)            | $5.433(1)$  | $B_{\text{iso}}, \text{Zn } 2d$ | $1.5(2) \text{ \AA}^2$ | $z_{\text{S}}$ | $0.87(1)$ |
| $c$ (Å)            | $10.840(3)$ | $B_{\text{iso}}, \text{Sn } 2b$ | $0.8(1) \text{ \AA}^2$ |                |           |
| $Y$                | $0.0291(2)$ | $B_{\text{iso}}, \text{S } 8g$  | $0.5(1) \text{ \AA}^2$ |                |           |
| $U$                | $-0.025(1)$ | Occ, Cu 2c                      | $0.933(5)$             |                |           |
| $V$                | $0.0128(8)$ | Occ, Sn 2b                      | $0.940(8)$             |                |           |

Figure S12: Rietveld refinement of synchrotron data obtained for annealed sample D.

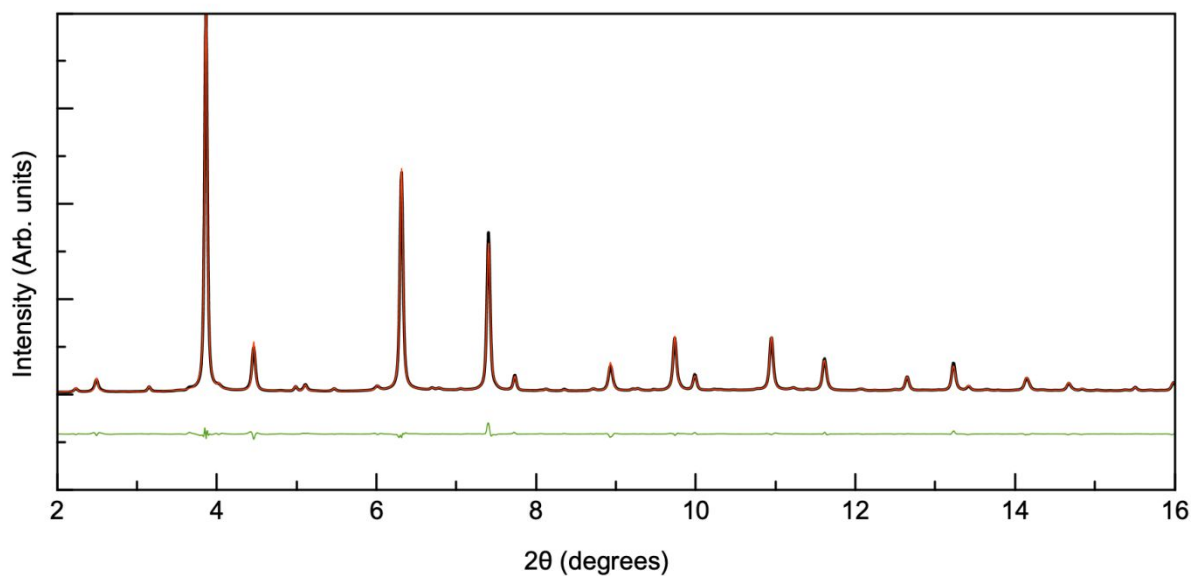

|                    |             |                                 |                        |                |           |
|--------------------|-------------|---------------------------------|------------------------|----------------|-----------|
| $R_{\text{Bragg}}$ | 2.70%       | $B_{\text{iso}}, \text{Cu } 2a$ | $0.7(2) \text{ \AA}^2$ | $x_{\text{S}}$ | $0.78(2)$ |
| $R_{\text{F}}$     | 4.90%       | $B_{\text{iso}}, \text{Cu } 2c$ | $0.6(1) \text{ \AA}^2$ | $y_{\text{S}}$ | $0.74(1)$ |
| $a$ (Å)            | $5.433(1)$  | $B_{\text{iso}}, \text{Zn } 2d$ | $1.4(1) \text{ \AA}^2$ | $z_{\text{S}}$ | $0.87(1)$ |
| $c$ (Å)            | $10.837(3)$ | $B_{\text{iso}}, \text{Sn } 2b$ | $0.9(1) \text{ \AA}^2$ |                |           |
| $Y$                | $0.0293(2)$ | $B_{\text{iso}}, \text{S } 8g$  | $0.6(1) \text{ \AA}^2$ |                |           |
| $U$                | $-0.045(1)$ | Occ, Cu 2c                      | $0.88(2)$              |                |           |
| $V$                | $0.014(6)$  | Occ, Sn 2b                      | $0.92(1)$              |                |           |

Figure S13: Rietveld refinement of synchrotron data obtained for annealed sample E.



## PDF results

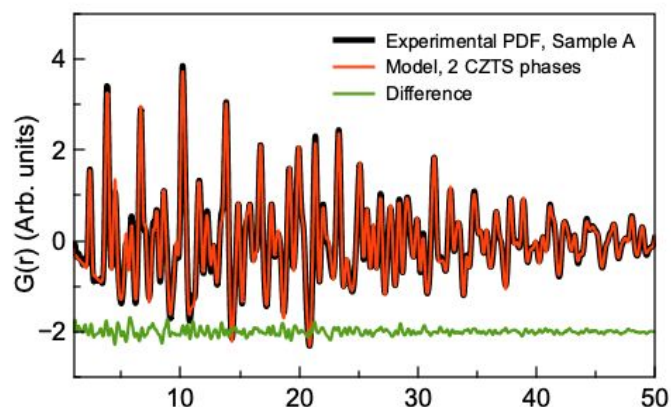

Figure S14: Fit of the PDF obtained for annealed sample A, using two CZTS phases of different domain sizes.

| PDF refinement, sample A             |        |                                    |      |
|--------------------------------------|--------|------------------------------------|------|
| $R_w$                                | 9.71%  | $x_S$                              | 0.76 |
| $a$ (Å)                              | 5.428  | $y_S$                              | 0.75 |
| $c$ (Å)                              | 10.808 | $z_S$                              | 0.87 |
| $\delta_2$                           | 3.9 Å  | $B_{iso}$ (Å <sup>2</sup> ), Cu 2a | 0.48 |
|                                      |        | $B_{iso}$ (Å <sup>2</sup> ), Cu 2c | 0.35 |
|                                      |        | $B_{iso}$ (Å <sup>2</sup> ), Zn 2d | 0.48 |
| Weight percent, bulk phase           | 83%    | $B_{iso}$ (Å <sup>2</sup> ), Sn 2b | 0.25 |
| Weight percent, nanophase            | 17%    | $B_{iso}$ (Å <sup>2</sup> ), S 8g  | 0.17 |
| Average crystallite size, nanophase* | 17 Å   |                                    |      |

\*The structural parameters for the bulk and nanosized phases were constrained to take the same value, and only the scale factors and the size for the nanophase were refined independently. The occupancies for the metals were kept fixed at the values obtained in the corresponding Rietveld refinements.

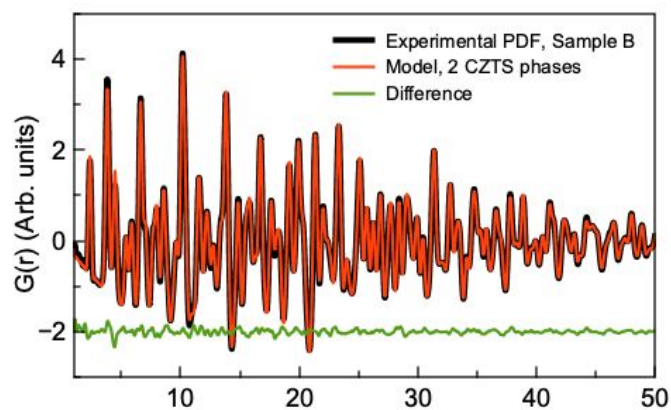

Figure S15: Fit of the PDF obtained for annealed sample B, using two CZTS phases of different domain sizes.

| PDF refinement, sample B             |        |                                    |      |
|--------------------------------------|--------|------------------------------------|------|
| $R_w$                                | 5.7%   | $x_s$                              | 0.77 |
| $a$ (Å)                              | 5.429  | $y_s$                              | 0.75 |
| $c$ (Å)                              | 10.807 | $z_s$                              | 0.87 |
| $\delta_2$                           | 4.18 Å | $B_{iso}$ (Å <sup>2</sup> ), Cu 2a | 0.51 |
|                                      |        | $B_{iso}$ (Å <sup>2</sup> ), Cu 2c | 0.34 |
|                                      |        | $B_{iso}$ (Å <sup>2</sup> ), Zn 2d | 0.37 |
| Weight percent, bulk phase           | 85%    | $B_{iso}$ (Å <sup>2</sup> ), Sn 2b | 0.21 |
| Weight percent, nanophase            | 15%    | $B_{iso}$ (Å <sup>2</sup> ), S 8g  | 0.27 |
| Average crystallite size, nanophase* | 23 Å   |                                    |      |

\*The structural parameters for the bulk and nanosized phases were constrained to take the same value, and only the scale factors and the size for the nanophase were refined independently. The occupancies for the metals were kept fixed at the values obtained in the corresponding Rietveld refinements.

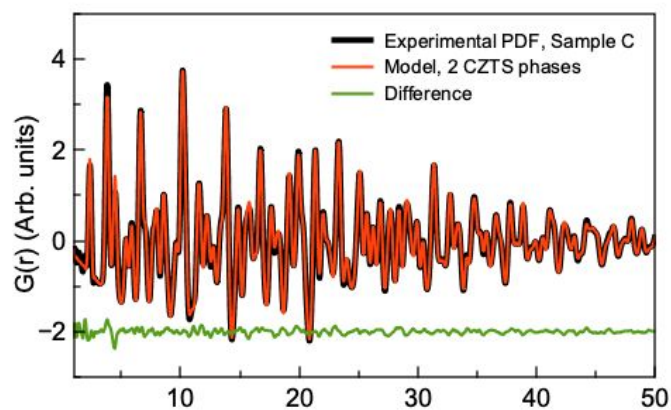

Figure S16: Fit of the PDF obtained for annealed sample C, using two CZTS phases of different domain sizes.

| <b>PDF refinement, sample C</b>      |        |                                    |      |
|--------------------------------------|--------|------------------------------------|------|
| $R_w$                                | 7.1%   | $x_s$                              | 0.76 |
| $a$ (Å)                              | 5.426  | $y_s$                              | 0.75 |
| $c$ (Å)                              | 10.800 | $z_s$                              | 0.87 |
| $\delta_2$                           | 3.99 Å | $B_{iso}$ (Å <sup>2</sup> ), Cu 2a | 0.49 |
|                                      |        | $B_{iso}$ (Å <sup>2</sup> ), Cu 2c | 0.38 |
|                                      |        | $B_{iso}$ (Å <sup>2</sup> ), Zn 2d | 0.23 |
| Weight percent, bulk phase           | 75%    | $B_{iso}$ (Å <sup>2</sup> ), Sn 2b | 0.23 |
| Weight percent, nanophase            | 25%    | $B_{iso}$ (Å <sup>2</sup> ), S 8g  | 0.25 |
| Average crystallite size, nanophase* | 26 Å   |                                    |      |

\*The structural parameters for the bulk and nanosized phases were constrained to take the same value, and only the scale factors and the size for the nanophase were refined independently. The occupancies for the metals were kept fixed at the values obtained in the corresponding Rietveld refinements.

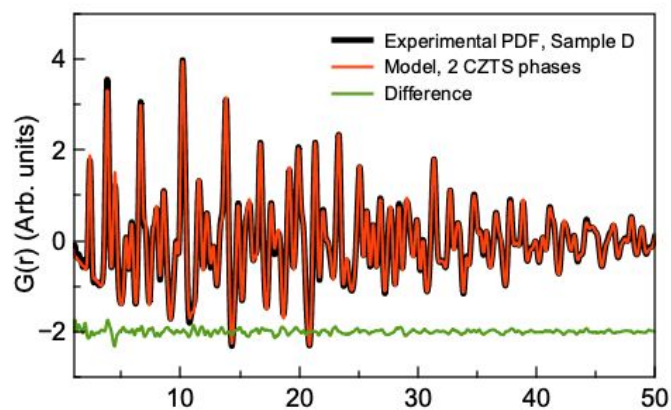

Figure S17: Fit of the PDF obtained for annealed sample D, using two CZTS phases of different domain sizes.

| <b>PDF refinement, sample D</b>      |        |                                    |      |
|--------------------------------------|--------|------------------------------------|------|
| $R_w$                                | 6.2%   | $x_s$                              | 0.76 |
| $a$ (Å)                              | 5.426  | $y_s$                              | 0.75 |
| $c$ (Å)                              | 10.800 | $z_s$                              | 0.87 |
| $\delta_2$                           | 4.10 Å | $B_{iso}$ (Å <sup>2</sup> ), Cu 2a | 0.49 |
|                                      |        | $B_{iso}$ (Å <sup>2</sup> ), Cu 2c | 0.38 |
|                                      |        | $B_{iso}$ (Å <sup>2</sup> ), Zn 2d | 0.23 |
| Weight percent, bulk phase           | 79%    | $B_{iso}$ (Å <sup>2</sup> ), Sn 2b | 0.23 |
| Weight percent, nanophase            | 21%    | $B_{iso}$ (Å <sup>2</sup> ), S 8g  | 0.25 |
| Average crystallite size, nanophase* | 27 Å   |                                    |      |

\*The structural parameters for the bulk and nanosized phases were constrained to take the same value, and only the scale factors and the size for the nanophase were refined independently. The occupancies for the metals were kept fixed at the values obtained in the corresponding Rietveld refinements.

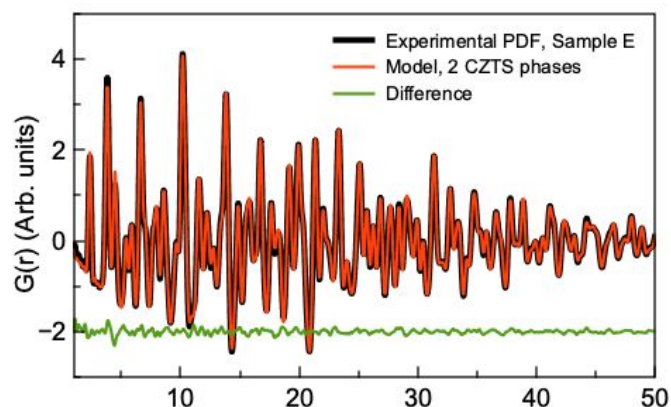

Figure S18: Fit of the PDF obtained for annealed sample E, using two CZTS phases of different domain sizes.

| <b>PDF refinement, sample D</b>      |        |                                    |      |
|--------------------------------------|--------|------------------------------------|------|
| $R_w$                                | 6.0%   | $x_s$                              | 0.76 |
| $a$ (Å)                              | 5.427  | $y_s$                              | 0.75 |
| $c$ (Å)                              | 10.803 | $z_s$                              | 0.87 |
| $\delta_2$                           | 4.33 Å | $B_{iso}$ (Å <sup>2</sup> ), Cu 2a | 0.49 |
|                                      |        | $B_{iso}$ (Å <sup>2</sup> ), Cu 2c | 0.38 |
|                                      |        | $B_{iso}$ (Å <sup>2</sup> ), Zn 2d | 0.23 |
| Weight percent, bulk phase           | 81%    | $B_{iso}$ (Å <sup>2</sup> ), Sn 2b | 0.23 |
| Weight percent, nanophase            | 19%    | $B_{iso}$ (Å <sup>2</sup> ), S 8g  | 0.25 |
| Average crystallite size, nanophase* | 30 Å   |                                    |      |

\*The structural parameters for the bulk and nanosized phases were constrained to take the same value, and only the scale factors and the size for the nanophase were refined independently. The occupancies for the metals were kept fixed at the values obtained in the corresponding Rietveld refinements.
